# Supplementary material for: Benefits of Local Treatment Including External Radiotherapy for Hepatocellular Carcinoma with Portal Invasion
Source: PubMed Central journal article supplement (PMC8070697; doi:10.3390/biology10040326), 2021-04-14
Supplement: biology-10-00326-s001.pdf [file biology-10-00326-s001.pdf]

**Table S1.** Clinical characteristics of patients in the LRT only group and LRT with TACE group.

| <b>Covariates</b>        | <b>LRT Only<br/>(<i>n</i> = 78)</b> | <b>LRT with TACE<br/>(<i>n</i> = 144)</b> | <b><i>p</i> Value</b> |
|--------------------------|-------------------------------------|-------------------------------------------|-----------------------|
| Age                      | 55.2 ± 11.3                         | 53.9 ± 9.3                                | 0.014                 |
| Gender                   |                                     |                                           | 0.290                 |
| Male                     | 64 (82.1)                           | 127 (88.2)                                |                       |
| Female                   | 14 (17.9)                           | 17 (11.8)                                 |                       |
| Etiology                 |                                     |                                           | 0.324                 |
| Other cause              | 21 (26.9)                           | 29 (20.1)                                 |                       |
| Hepatitis B virus        | 57 (73.1)                           | 115 (79.9)                                |                       |
| Child-Pugh score         |                                     |                                           |                       |
| Extrahepatic metastases  |                                     |                                           | 0.083                 |
| None                     | 54 (69.2)                           | 116 (80.6)                                |                       |
| Present                  | 24 (30.8)                           | 28 (19.4)                                 |                       |
| Main tumor size          |                                     |                                           | 0.216                 |
| <10cm                    | 32 (41.0)                           | 73 (50.7)                                 |                       |
| ≥10cm                    | 46 (59.0)                           | 71 (49.3)                                 |                       |
| Multiplicity             |                                     |                                           | 0.168                 |
| Multiple                 | 43 (55.1)                           | 64 (44.4)                                 |                       |
| Single                   | 35 (44.9)                           | 80 (55.6)                                 |                       |
| Alpha-fetoprotein, ug/mL |                                     |                                           | 0.193                 |
| <400                     | 36 (46.2)                           | 58 (40.3)                                 |                       |
| 400~10,000               | 22 (28.2)                           | 32 (22.2)                                 |                       |
| ≥10,000                  | 20 (25.6)                           | 54 (37.5)                                 |                       |
| Child-Pugh class         |                                     |                                           | 0.141                 |
| A                        | 47 (60.3)                           | 105 (72.9)                                |                       |
| B                        | 30 (38.5)                           | 37 (25.7)                                 |                       |
| C                        | 1 (1.3)                             | 2 (1.4)                                   |                       |
| Performance status       |                                     |                                           | 0.943                 |
| 0 or 1                   | 59 (95.2)                           | 112 (94.9)                                |                       |
| 2 or higher              | 3 (4.8)                             | 6 (5.1)                                   |                       |

Variables are expressed as mean ± standard deviation or *n* (%). LRT, local treatment including radiotherapy; TACE, transarterial chemoembolization.
